# Supplementary material for: Accuracy Assessment of Chinese Large Language Models in Psoriasis Management: A Multicenter Expert Consensus Study
Source: Research Square preprint supplement (doi:10.21203/rs.3.rs-8155599/v1), 2026-01-23
Supplement: Supplementary file 1 [file fd0c50b48506d904dd4cd88e.pdf]

# **Psoriasis High-Frequency Questions**

- 1. What is psoriasis?**
- 2. What causes psoriasis?**
- 3. Why is psoriasis so prone to recurrence?**
- 4. Is psoriasis hereditary? What is the probability of inheritance?**
- 5. Does psoriasis affect fertility? Can I have children?**
- 6. Can only adults get psoriasis?**
- 7. Is psoriasis just a skin disease?**
- 8. Can psoriasis be cured completely?**
- 9. Do psoriasis patients need to avoid certain foods? What should they pay attention to in their diet?**
- 10. Can people with psoriasis drink alcohol?**
- 11. Can psoriasis patients smoke?**
- 12. Why does staying up late worsen psoriasis?**
- 13. Is psoriasis related to seasons?**
- 14. Is the incidence of psoriasis related to geographical environment?**
- 15. Why does increased stress exacerbate psoriasis?**
- 16. Is exercise beneficial for psoriasis?**
- 17. Is the onset of psoriasis related to infections?**

- 18. Why does the recurrence or exacerbation of psoriasis occur when immunity decreases?**
- 19. Why should psoriasis patients avoid catching a cold?**
- 20. Is psoriasis related to body weight?**
- 21. Why does psoriasis cause scaling?**
- 22. Can psoriasis be accompanied by other diseases?**
- 23. What are the treatment methods for psoriasis?**
- 24. What are the side effects of long-term topical steroid use in psoriasis patients?**
- 25. Is there a specific effective treatment for psoriasis?**
- 26. Why is it important to enhance skin hydration for psoriasis?**
- 27. How can the recurrence of psoriasis be reduced in daily life?**
- 28. What is biologic therapy for psoriasis?**
- 29. What are the advantages of biologic therapy for psoriasis?**
- 30. What biologics for psoriasis are currently available on the market in mainland China?**
- 31. Which patients with psoriasis are eligible for biologic therapy?**
- 32. What tests are required for biologic therapy in psoriasis?**
- 33. What are the side effects of biologic therapy for psoriasis?**

- 34.Can biologic therapy cure psoriasis?**
- 35.How long is the course of biologic therapy for psoriasis? Is it necessary to continue treatment for life?**
- 36.What is the approximate cost of biologic therapy for psoriasis?**
- 37.After using biologics, will other medications become ineffective?**
- 38.How long should a female patient wait to conceive after using biologics for psoriasis?**
- 39.Is breastfeeding possible while undergoing biologic therapy for psoriasis?**
- 40.Does everyone respond well to biologics for psoriasis?**
